# Supplementary material for: Genome Erosion in a Nitrogen-Fixing Vertically Transmitted Endosymbiotic Multicellular Cyanobacterium
Source: PLoS One. 2010 Jul 8;5(7):e11486. doi: 10.1371/journal.pone.0011486 (PMC2900214; doi:10.1371/journal.pone.0011486)
Supplement: Table S1 — Comparison of the minimal bacterial gene set to NoAz. (0.06 MB XLS) [file pone.0011486.s002.xls]

## Sheet: Sheet1
Table S1. Comparison of the minimal bacterial gene set to NoAz.
Function	Gene symbol	EC number	Product	NoAz	Noss	Avar	Nosp
1.1. DNA metabolism
1.1.1. Basic replication machinery
	dnaB	3.6.1.-	replicative DNA helicase	Aazo_2896	all0578	Ava_0330	Npun_F2831
	dnaE	2.7.7.7	DNA polymerase III, alpha subunit	Aazo_4135	all3578	Ava_1603	Npun_F4872
	dnaG	2.7.7.-	DNA primase	Aazo_3686	all1323	Ava_3790	Npun_R3583
	dnaN	2.7.7.7	DNA polymerase III, beta subunit	Aazo_2082	alr2010	Ava_0002	Npun_R0034
	dnaN	2.7.7.7	DNA polymerase III, beta subunit	Aazo_5292 (*)	alr7569	Ava_C0075	Npun_R0034
	dnaQ	2.7.7.7	DNA polymerase III epsilon subunit	(-)	(-)	Ava_B0261	(-)
	dnaX	2.7.7.7	DNA polymerase III gamma and tau subunits	Aazo_4353	alr4932	Ava_2215	Npun_F4123
	dnaX	2.7.7.7	DNA polymerase III gamma and tau subunits	Aazo_5290 (*)	alr4932	Ava_2215	Npun_F4123
	gyrA	5.99.1.3	DNA gyrase, A subunit	Aazo_0531	all0860	Ava_4464	Npun_F0025
	gyrA	5.99.1.3	DNA gyrase, A subunit	Aazo_2820	all0441	Ava_2854	Npun_R6377
	gyrB	5.99.1.3	DNA gyrase, B subunit	Aazo_2816	all5265	Ava_2517	Npun_F6373
	holA	2.7.7.7	DNA polymerase III, delta subunit	Aazo_3538	alr3444	Ava_3469	Npun_F4117
	holB	2.7.7.7	DNA polymerase III, delta prime subunit	Aazo_3025	all4705	Ava_1963	Npun_F6434
	hupB		histone family protein DNA-binding protein	Aazo_0318	asr3935	Ava_1767	Npun_F5010
	lig	6.5.1.2	DNA ligase, NAD-dependent	Aazo_3950	all1717	Aazo_3950	Npun_F0173
	ssb		single-strand binding protein	Aazo_0865	alr0088	Aazo_0865	Npun_F1842
	ssb		single-strand binding protein	Aazo_5287 (*)	alr7579	Ava_C0119	(-)
1.1.2. DNA repair, restriction and modification
	nth	4.2.99.18	endonuclease III	Aazo_2727	all3970	Ava_1731	Npun_F4036
	polA	2.7.7.7	5'-3' exonuclease domain of DNA polymerase I	Aazo_0136	alr1254	Ava_0581	Npun_F6197
	ung	3.2.2.-	uracil-DNA glycosylase	Aazo_0465 (+)	(-)	(-)	(-)
1.2. RNA metabolism
1.2.1. Basic transcription machinery
	deaD		ATP-dependent RNA helicase	Aazo_0442	alr1223	Ava_0642	Npun_F4515
	greA		transcription elongation factor	(-)	(-)	(-)	(-)
	nusA		transcription elongation factor	Aazo_0597	alr3829	Ava_1870	Npun_R5775
	nusG		transcription antitermination protein	Aazo_1041	alr5299	Ava_2551	Npun_F5850
	rpoA	2.7.7.6	DNA-directed RNA polymerase subunit alpha	Aazo_2583	all4191	Ava_0715	Npun_R4366
	rpoB	2.7.7.6	DNA-directed RNA polymerase subunit beta	Aazo_1016	alr1594	Ava_4207	Npun_F4985
	rpoC1	2.7.7.6	DNA-directed RNA polymerase subunit gamma	Aazo_1015	alr1595	Ava_4208	Npun_F4986
	rpoC2	2.7.7.6	DNA-directed RNA polymerase beta' subunit	Aazo_1014	alr1596	Ava_4209	Npun_F4987
	rpoD		RpoD family RNA polymerase sigma factor	Aazo_2817	all5263	Ava_1410	Npun_F6374
1.2.2. Translation
1.2.2.1. Aminoacyl-tRNA synthesis
	alaS	6.1.1.7	alanyl-tRNA synthetase	Aazo_3088	alr2418	Ava_0226	Npun_F0562
	argS	6.1.1.19	arginyl-tRNA synthetase	Aazo_2060	all3717	Ava_3561	Npun_R4006
	asnS	6.1.1.22	asparaginyl-tRNA synthetase	Aazo_3649	alr3658	Ava_3630	Npun_R0874
	aspS	6.1.1.12	aspartyl-tRNA synthetase	Aazo_5000	all2436	Ava_0247	Npun_F3458
	cysS	6.1.1.16	cysteinyl-tRNA synthetase	Aazo_0710	all1092	Ava_3718	Npun_F3946
	glnS	6.1.1.18	glutaminyl-tRNA synthetase	(-)	(-)	(-)	(-)
	gltX	6.1.1.17	glutamyl-tRNA synthetase	Aazo_3060	all3205	Ava_4861	Npun_R1357
	glyS	6.1.1.14	glycine tRNA synthetase beta subunit	Aazo_2984	alr4111	Ava_0794	Npun_R4010
	hisS	6.1.1.21	histidyl tRNA synthetase	Aazo_2602	all5012	Ava_2260	Npun_R5420
	ileS	6.1.1.5	isoleucyl-tRNA synthetase	Aazo_5054	alr1073	Ava_3774	Npun_F1478
	leuS	6.1.1.4	leucyl-tRNA synthetase	Aazo_4197	alr3283	Ava_4936	Npun_F4156
	lysS	6.1.1.6	lysine tRNA synthetase	Aazo_4154(+)	(-)	(-)	(-)
	lysS	6.1.1.6	lysine tRNA synthetase	(-)	all4071	Ava_3150	Npun_R5202
	metG	6.1.1.10	methionyl-tRNA synthetase	Aazo_4858	all0233	Ava_2723	Npun_R0092
	pheS	6.1.1.20	phenylalanine tRNA synthetase alpha subunit	Aazo_3254	all4845	Ava_2115	Npun_R0940
	pheT	6.1.1.20	phenylalanine tRNA synthetase beta subunit	Aazo_4963	alr4958	Ava_2221	Npun_F1087
	proS	6.1.1.15	prolyl-tRNA synthetase	Aazo_0163	alr5053	Ava_2311	Npun_F0436
	serS	6.1.1.11	seryl-tRNA synthetase	Aazo_2729	all3976	Ava_1724	Npun_F4034
	thrS	6.1.1.3	threonyl-tRNA synthetase	Aazo_2841	alr0335	Ava_2787	Npun_F5857
	trpS	6.1.1.2	tryptophanyl-tRNA synthetase	Aazo_4670	all1269	Ava_2993	Npun_R5070
	tyrS	6.1.1.1	tyrosyl-tRNA synthetase	Aazo_2067	alr2982	Ava_0925	Npun_R3869
	valS	6.1.1.9	valyl-tRNA synthetase	Aazo_4102	all1318	Ava_2982	Npun_R4682
1.2.2.2. tRNA maturation and modification
	mnmA	2.1.1.61	tRNA (5-methylaminomethyl-2-thiouridylate)-methyltransferase	Aazo_1582	all1359	Ava_4065	Npun_F5444
	mnmE		tRNA modification GTPase	Aazo_1908	all4677	Ava_1989	Npun_F4302
	mnmG/gidA		tRNA uridine 5-carboxymethylaminomethyl modification enzyme	Aazo_2420	alr3561	Ava_3539	Npun_R6439
	rnpA	3.1.26.5	protein component of ribonuclease P	Aazo_0685	alr3413	Ava_3433	Npun_R1587
	pth	3.1.1.29	peptidyl-tRNA hydrolase	Aazo_1919	all0844	Ava_4448	Npun_F4317
	iscS	4.4.1.-	cysteine desulfurase	Aazo_1356	all1457	Ava_3914	Npun_R0418
1.2.2.3. Ribosomal proteins
	rplA		50S ribosomal subunit protein L1	Aazo_1039	alr5301	Ava_2553	Npun_F5852
	rplB		50S ribosomal subunit protein L2	Aazo_2562	all4212	Ava_0694	Npun_R4387
	rplC		50S ribosomal subunit protein L3	Aazo_2559	all4215	Ava_0691	Npun_R4390
	rplD		50S ribosomal subunit protein L4	Aazo_2560	all4214	Ava_0692	Npun_R4389
	rplE		50S ribosomal subunit protein L5	Aazo_2571	all4203	Ava_0703	Npun_R4378
	rplF		50S ribosomal subunit protein L6	Aazo_2573	all4201	Ava_0705	Npun_R4376
	rplI		50S ribosomal subunit protein L9	Aazo_2897	all0579	Ava_0329	Npun_F2830
	rplJ		50S ribosomal subunit protein L10	Aazo_1038	alr5302	Ava_2554	Npun_F5853
	rplK		50S ribosomal subunit protein L11	Aazo_1040	alr5300	Ava_2552	Npun_F5851
	rplL		50S ribosomal subunit protein L12	Aazo_1037	alr5303	Ava_2555	Npun_F5854
	rplM		50S ribosomal subunit protein L13	Aazo_2586	all4188	Ava_0718	Npun_R4363
	rplN		50S ribosomal subunit protein L14	Aazo_2569	all4205	Ava_0701	Npun_R4380
	rplO		50S ribosomal subunit protein L15	Aazo_2576	all4198	Ava_0708	Npun_R4373
	rplP		50S ribosomal subunit protein L16	Aazo_2566	all4208	Ava_0698	Npun_R4383
	rplQ		50S ribosomal subunit protein L17	Aazo_2584	all4190	Ava_0716	Npun_R4365
	rplR		50S ribosomal subunit protein L18	Aazo_2574	all4200	Ava_0706	Npun_R4375
	rplS		50S ribosomal subunit protein L19	Aazo_1043	alr5297	Ava_2549	Npun_F5848
	rplT		50S ribosomal subunit protein L20	Aazo_4309	alr3428	Ava_3448	Npun_R4937
	rplU		50S ribosomal subunit protein L21	Aazo_0423	all0147	Ava_1516	Npun_R6114
	rplV		50S ribosomal subunit protein L22	Aazo_2564	all4210	Ava_0696	Npun_R4385
	rplW		50S ribosomal subunit protein L23	Aazo_2561	all4213	Ava_0693	Npun_R4388
	rplX		50S ribosomal subunit protein L24	Aazo_2570	asl4204	Ava_0702	Npun_R4379
	rpmA		50S ribosomal subunit protein L27	Aazo_0424	asl0146	Ava_1515	Npun_R6113
	rpmB		50S ribosomal subunit protein L28	Aazo_1605	asl2630	Ava_0142	(-)
	rpmC		50S ribosomal subunit protein L29	Aazo_2567	asl4207	Ava_0699	Npun_R4382
	rpmE		50S ribosomal subunit protein L31	Aazo_2588	asl4186	Ava_0720	Npun_R4361
	rpmF		50S ribosomal subunit protein L32	Aazo_2360	asl3674	Ava_3613	Npun_R0842
	rpmG		50S ribosomal subunit protein L33	Aazo_5172	asl4452	Ava_1320	Npun_R4941
	rpmH		50S ribosomal subunit protein L34	Aazo_0684	asr3412	Ava_3432	Npun_R1588
	rpmI		50S ribosomal subunit protein L35	Aazo_4310	asr3427	Ava_3447	Npun_R4938
	rpmJ		50S ribosomal subunit protein L36	Aazo_2580	asl4194	Ava_0712	Npun_R4369
	rpsB		30S ribosomal subunit protein S2	Aazo_4883	all4792	Ava_2061	Npun_R5570
	rpsC		30S ribosomal subunit protein S3	Aazo_2565	all4209	Ava_0697	Npun_R4384
	rpsD		30S ribosomal subunit protein S4	Aazo_3730	alr2737	Ava_4303	Npun_R1720
	rpsE		30S ribosomal subunit protein S5	Aazo_2575	all4199	Ava_0707	Npun_R4374
	rpsF		30S ribosomal subunit protein S6	Aazo_4893	all4802	Ava_2072	Npun_F5559
	rpsG		30S ribosomal subunit protein S7	Aazo_0660	all4339	Ava_1289	Npun_F3882
	rpsH		30S ribosomal subunit protein S8	Aazo_2572	all4202	Ava_0704	Npun_R4377
	rpsI		30S ribosomal subunit protein S9	Aazo_2587	all4187	Ava_0719	Npun_R4362
	rpsJ		30S ribosomal subunit protein S10	Aazo_0663	all4336	Ava_1286	Npun_F3885
	rpsK		30S ribosomal subunit protein S11	Aazo_2582	all4192	Ava_0714	Npun_R4367
	rpsL		30S ribosomal subunit protein S12	Aazo_0659	all4340	Ava_1290	Npun_F3881
	rpsM		30S ribosomal subunit protein S13	Aazo_2581	all4193	Ava_0713	Npun_R4368
	rpsN		30S ribosomal subunit protein S14	Aazo_2726	all3969	Ava_1732	Npun_F4037
	rpsO		30S ribosomal subunit protein S15	Aazo_3907	asl0749	Ava_4651	Npun_F0723
	rpsP		30S ribosomal subunit protein S16	Aazo_1143	asr1953	Ava_4357	Npun_F2858
	rpsQ		30S ribosomal subunit protein S17	Aazo_2568	asl4206	Ava_0700	Npun_R4381
	rpsR		30S ribosomal subunit protein S18	Aazo_5173	asl4451	Ava_1321	Npun_R4940
	rpsS		30S ribosomal subunit protein S19	Aazo_2563	asl4211	Ava_0695	Npun_R4386
	rpsT		30S ribosomal subunit protein S20	Aazo_1019	asr1592	Ava_4205	Npun_F4983
1.2.2.4. Ribosome function, maturation and modification
	ksgA	2.1.1.-	dimethyladenosine transferase	Aazo_3810	alr3229	Ava_4886	Npun_R4912
	rbfA		ribosome-binding factor A	Aazo_4927	alr0063	Ava_2665	Npun_F0703
	engA		GTP-binding protein	Aazo_3566	alr0483	Ava_2896	Npun_R1702
	obg		GTP-binding protein	Aazo_3952	alr3739	Ava_1586	Npun_F3262
	ychF		GTP-binding protein	Aazo_3794	all0723	Ava_4625	Npun_R6366
	era		GTP-binding protein	Aazo_1611	alr0912	Ava_4517	Npun_F0483
	cspR	2.1.1.-	ribosomal methytransferase	Aazo_4609	alr3352	Ava_3194	Npun_F6077
1.2.2.5. Translation factors
	efp		elongation factor P	Aazo_0810	all5058	Ava_2315	Npun_R0440
	fusA	3.6.5.3	elongation factor G	Aazo_0661	all4338	Ava_1288	Npun_F3883
	fusA	3.6.5.3	elongation factor G	Aazo_0279	alr4383	Ava_3294	Npun_R5063
	frr		ribosome recycling factor	Aazo_0065	alr1208	Ava_0629	Npun_F6137
	hemK	2.1.1.-	N5-glutamine methyltransferase, modulation of release factors activity	Aazo_4971	alr0115	Ava_1484	Npun_R3856
	infA		nitiation factor IF-1	Aazo_2579	asl4195	Ava_0711	Npun_R4370
	infB		nitiation factor IF-2	Aazo_0599	alr3832	Ava_1867	Npun_R5773
	infC		nitiation factor IF-3	Aazo_4675	all4623	Ava_2038	Npun_F6393
	lepA		GTP-binding elongation factor	Aazo_3444	all2508	Ava_0440	Npun_F1552
	prfA		peptide chain release factor 1 (RF1)	Aazo_2589	all4185	Ava_0721	Npun_R4360
	smpB		tmRNA-binding protein	Aazo_0820	alr5070	Ava_2325	Npun_F0451
	tsf		elongation factor Ts	Aazo_4882	all4791	Ava_2060	Npun_R5569
	tufA	3.6.5.3	elongation factor Tu	Aazo_0662	all4337	Ava_1287	Npun_F3884
1.2.3. RNA degradation
	pnp	2.7.7.8	polyribonucleotide nucleotidyltransferase	Aazo_1071	all4396	Ava_3279	Npun_R3625
	rnc	3.1.26.3	ribonuclease III	Aazo_3201	all4107	Ava_0797	Npun_F1233
	rnc	3.1.26.3	ribonuclease III	Aazo_4580	alr0280	Ava_3081	Npun_R1331
2. Protein processing, folding and secretion
2.1 Protein post-translational modification
	map	3.4.11.18	methionine aminopeptidase	Aazo_0183	alr4150	Ava_0754	Npun_R3725
	map	3.4.11.18	methionine aminopeptidase	Aazo_0333	all1019	Ava_3676	Npun_R4996
	pepA	3.4.11.1	aminopeptidase A/I	Aazo_2018	alr0237	Ava_2727	Npun_F0097
2.2. Protein folding
	dnaJ		Hsp70 co-chaperone	Aazo_1980	alr2447	Ava_0379	Npun_F0123
	dnaJ		Hsp70 co-chaperone	Aazo_3783	alr4553	Ava_2507	Npun_F2810
	dnaK		chaperone HSP70	Aazo_1975	alr2446	Ava_0378	Npun_F0122
	dnaK		chaperone HSP70	Aazo_3373	alr1742	Ava_0295	Npun_F0567
	dnaK		chaperone HSP70	Aazo_2048	alr1742	Ava_C0141	Npun_F5907
	dnaK		chaperone HSP70	Aazo_4730	alr2990	Ava_0919	Npun_R5998
	groEL		class I heat-shock protein	Aazo_3205	alr1896	Ava_3766	Npun_F1230
	groEL		class I heat-shock protein	Aazo_2884	alr3662	Ava_3626	Npun_R0829
	groES		class I heat-shock protein	Aazo_2885	alr3661	Ava_3627	Npun_R0830
	grpE		Hsp70 co-chaperone	Aazo_1973	alr2445	Ava_0377	Npun_F0121
	grpE		Hsp70 co-chaperone	Aazo_1227	all4473	Ava_1312	(-)
2.3. Protein translocation and secretion
	ffh		protein component of signal recognition particle (SRP)	Aazo_1142	alr1952	Ava_4358	Npun_F2857
	ftsY		signal recognition particle receptor	Aazo_1588	all1759	Ava_0277	Npun_F0081
	secA		preprotein translocase subunit (ATPase)	Aazo_3269	alr4851	Ava_2124	Npun_F0949
	secE		membrane-embebed preprotein translocase subunit	Aazo_1042	asr5298	Ava_2550	Npun_F5849
	secY		membrane-embebed preprotein translocase subunit	Aazo_2577	all4197	Ava_0709	Npun_R4372
2.4. Protein turnover
	gcp	3.4.24.57	probable O-sialoglycoprotein endopeptidase	Aazo_4977	alr0110	Ava_1479	Npun_R3861
	hflB/ftsH	3.4.24.-	ATP-dependent protease	Aazo_5220	all4776	Ava_2444	Npun_F1740
	hflB/ftsH	3.4.24.-	ATP-dependent protease	Aazo_0357	alr1261	Ava_0575	Npun_F4881
	hflB/ftsH	3.4.24.-	ATP-dependent protease	Aazo_3058	all3642	Ava_3190	Npun_R1355
	hflB/ftsH	3.4.24.-	ATP-dependent protease	Aazo_2804	all4936	Ava_2234	Npun_R2022
	lon	3.4.21.53	ATP-dependent protease La	Aazo_0664	all4335	Ava_1285	Npun_F3886
3. Cellular processes
3.1. Cell division
	ftsZ		cytoskeletal cell division protein	Aazo_1902	alr3858	Ava_1837	Npun_R4804
3.2. Transport
	pitA		low-affinity inorganic phosphate transporter	Aazo_3724	alr2336	Ava_0155	Npun_R1724
	ptsG	2.7.1.69	phosphotransferase system (PTS) glucose-specific enzyme II	Aazo_5089 (+)	(-)	(-)	Npun_R1176
	ptsH		histidine-containing phosphocarrier protein of the phosphotransferase system (PTS)	Aazo_5089 (+)	(-)	(-)	Npun_R1176
	ptsI	2.7.3.9	phosphotransferase system (PTS) enzyme I	Aazo_5089 (+)	(-)	(-)	Npun_R1176
4. Energetic and intermediary metabolism
4.1. Glycolysis
	eno	4.2.1.11	enolase	Aazo_1631	all3538	Ava_3517	Npun_R3508
	fbaA	4.1.2.13	fructose-1,6-bisphosphate aldolase	Aazo_4602	all4563	Ava_2492	Npun_F5584
	gapA	1.2.1.12	glyceraldehyde 3-phosphate dehydrogenase	Aazo_1831 (*)	all2566	Ava_0495	Npun_R0031
	gap2	1.2.1.13	glyceraldehyde 3-phosphate dehydrogenase (NADP+)	Aazo_0813	all5062	Ava_2318	Npun_R0444
	gpmA	5.4.2.1	phosphoglycerate mutase	Aazo_1610 (*)	alr1107	Ava_2177	Npun_F0472
	gpmA	5.4.2.1	phosphoglycerate mutase	Aazo_4242	alr3338	Ava_3651	Npun_F6047
	gpmA	5.4.2.1	phosphoglycerate mutase	Aazo_2546	all4182	Ava_0723	Npun_R4351
	ldh	1.1.1.27	L-lactate dehydrogenase	(-)	alr0058	Ava_2660	Npun_F2517
	pfkA	2.7.1.11	6-phosphofructokinase	Aazo_0224 (-)	alr1913	Ava_3044	Npun_R0482
	pgi	5.3.1.9	glucose-6-phosphate isomerase	Aazo_2767	alr1050	Ava_3708	Npun_F3925
	pgk	2.7.2.3	phosphoglycerate kinase	Aazo_4275	all4131	Ava_0772	Npun_F5938
	pykA	2.7.1.40	pyruvate kinase	Aazo_2208	all4008	Ava_1694	Npun_F4277
	pykA	2.7.1.40	pyruvate kinase	Aazo_1832 (*)	all2564	Ava_0494	Npun_R0030
	tpiA	5.3.1.1	triose phosphate isomerase	Aazo_1078	alr4385	Ava_3290	Npun_R4322
4.2. Proton-motive force generation
	atpA	3.6.3.14	ATP synthase alpha chain	Aazo_3338	all0005	Ava_2611	Npun_F4863
	atpB	3.6.3.15	ATP synthase A chain	Aazo_3333	all0010	Ava_2616	Npun_F4858
	atpC	3.6.3.16	ATP synthase epsilon chain	Aazo_1938	all5038	Ava_2297	Npun_R4416
	atpD	3.6.3.17	ATP synthase beta chain	Aazo_1939	all5039	Ava_2298	Npun_R4417
	atpE	3.6.3.18	ATP synthase C chain	Aazo_3334	asl0009	Ava_2615	Npun_F4859
	atpF	3.6.3.19	ATP synthase B chain	Aazo_3335	all0008	Ava_2614	Npun_F4860
	atpG	3.6.3.20	ATP synthase gamma chain	Aazo_3339	all0004	Ava_2610	Npun_F4864
	atpH	3.6.3.21	ATP synthase delta chain	Aazo_3337	all0006	Ava_2612	Npun_F4862
	yidC		essential for proper integration of ATPase into the membrane	Aazo_0687	alr3415	Ava_3435	Npun_R1585
4.3. Penthose phosphate pathway
	rpe	5.1.3.1	ribulose-phosphate 3-epimerase	Aazo_3229	alr0782	Ava_4675	Npun_F1541
	rpiA	5.3.1.6	ribose 5-phosphate isomerase	Aazo_4401	all0888	Ava_4491	Npun_R1123
	fkt	2.2.1.1	transketolase	Aazo_1635	alr3344	Ava_3645	Npun_R4557
	fkt	2.2.1.1	transketolase	Aazo_0419	all4052	Ava_1655	(-)
4.4. Lipid metabolism
	cdsA	2.7.7.41	phosphatidate cytidylyltransferase	Aazo_1182	all3875	Ava_1818	Npun_R5818
	fadD	6.2.1.3	acyl-CoA synthase	Aazo_1442	alr3602	Ava_3173	Npun_F6411
	gpsA	1.1.1.94	sn-glycerol-3-phosphate dehydrogenase	Aazo_0566	all1693	Ava_1163	Npun_F0995
	plsB	2.3.1.15	sn-glycerol-3-phosphate acyltransferase	(-)	(-)	(-)	(-)
	plsC	2.3.1.51	1-acyl-sn-glycerol-3-phosphate acyltransferase	Aazo_2012	alr0241	Ava_2731	Npun_F0101
	psd	4.1.1.65	phosphatidylserine decarboxylase	(-)	(-)	(-)	(-)
	pssA	2.7.8.8	phosphatidylserine synthase	(-)	(-)	(-)	(-)
4.5. Biosynthesis of nucleotides
	adk	2.7.4.3	adenylate kinase	Aazo_1526 (*)	alr0068	Ava_2670	Npun_R2522
	adk	2.7.4.3	adenylate kinase	Aazo_2578	all4196	Ava_0710	Npun_R4371
	dcd	3.5.4.13	dCTP deaminase	(-)	all0066	Ava_2668	Npun_F2524
	gmk	2.7.4.8	guanylate kinase	Aazo_4981	alr0106	Ava_1475	Npun_R3865
	hpt	2.4.2.8	hypoxanthine phosphoribosyltransferase	(-)	(-)	(-)	(-)
	ndk	2.7.4.6	nucleoside diphosphate kinase	Aazo_1845	alr3402	Ava_3424	Npun_R6278
	nrdE	1.17.4.1	ribonucleoside-diphosphate reductase (major subunit)	Aazo_1083	all4035	Ava_1670	(-)
	nrdF	1.17.4.1	ribonucleoside-diphosphate reductase (major subunit)	Aazo_1083	all4035	Ava_1670	(-)
	ppa	3.6.1.1	inorganic pyrophosphatase	Aazo_2698	all3570	Ava_3548	Npun_F2553
	prsA	2.7.6.1	phosphoribosylpyrophosphate synthase	Aazo_4372	alr4670	Ava_1994	Npun_F2374
	pyrG	6.3.4.2	CTP synthase	Aazo_4054	alr5000	Ava_2267	Npun_F6033
	thyA	2.1.1.45	thymidylate synthase	Aazo_5011 (+)	(-)	(-)	(-)
	thyX	2.1.1.148	thymidylate synthase (FAD)	(-)	alr0515	Ava_2917	Npun_R2526
	tmk	2.7.4.9	thymidylate kinase	Aazo_3024	all4708	Ava_1962	Npun_F6527
	trxA		thioredoxin	Aazo_3022	all1866	Ava_4761	Npun_F6249
	trxA		thioredoxin	Aazo_0912	all2341	Ava_0160	Npun_R3962
	trxA		thioredoxin	Aazo_3500	alr0052	Ava_2654	Npun_R5587
	trxA		thioredoxin	Aazo_0149	alr3955	Ava_1747	Npun_R6186
	trxB	1.8.1.9	thioredoxin reductase	Aazo_4061	all0737	Ava_4637	Npun_R0672
	trxB	1.8.1.9	thioredoxin reductase	(-)	alr2204	Ava_3376	Npun_R0589
	upp	2.4.2.9	uracil phosphoribosyltransferase	Aazo_0992	all2063	Ava_3111	Npun_F4226
4.5. Biosynthesis of cofactors
	coaA	2.7.1.33	pantothenate kinase	Aazo_1164	alr3896	Ava_1801	Npun_R5836
	coaD	2.7.7.3	4'-phospho-pantetheine adenylyltransferase	Aazo_0903	alr4700	Ava_1966	Npun_R3950
	coaE	2.7.1.24	dephosphocoenzyme A kinase	Aazo_3459	all1754	Ava_0282	Npun_R1865
	dfp	6.3.2.5/4.1.1.36	phosphopantothenate cysteine ligase, 4'-phospho-pantothenyl-L-cysteine decarboxylase	Aazo_2496	all3111	Ava_3811	Npun_F6058
	folA	1.5.1.3	dihydrofolate reductase	Aazo_1890 (+)	(-)	(-)	(-)
	glyA	2.1.2.1	glycine hydroxymethyltransferase	Aazo_4898	alr4806	Ava_2076	Npun_F5156
	metK	2.5.1.6	methionine adenosyltransferase	Aazo_1303	all3244	Ava_4899	(-)
	metK	2.5.1.6	methionine adenosyltransferase	Aazo_4838	alr4124	Ava_0780	Npun_F2753
	nadR	2.7.7.1	adenilyl transferase	Aazo_2599 (-)	(-)	(-)	(-)
	nadV	2.4.2.12	nicotinamide phosphoribosyltransferase	(-)	(-)	(-)	(-)
	pdxY	2.7.1.35	pyridoxal kinase	(-)	(-)	(-)	(-)
	ribF	2.7.1.26/2.7.7.2	riboflavin kinase, FMN adenylyltransferase	Aazo_3260	alr4848	Ava_2118	Npun_F0943
	yloS	2.7.6.2	thiamine pyrophosphokinase	(-)	(-)	(-)	(-)
5. Poorly characterized
	mesJ	6.3.4.-	tRNA(Ile)-lysidine synthetase	Aazo_4955	all0932	Ava_0511	Npun_F5958
	mraW	2.1.1.-	methyltrasferase	Aazo_2038	all3354	Ava_3196	Npun_R4969
	ybeY		conserved hypothetical protein	Aazo_4995	all0271	Ava_2782	Npun_F1345
	ycfF		histidine triad (HIT) protein	Aazo_3533	all4087	Ava_0817	Npun_R2398
	ycfH	3.1.21.-	putative deoxyribonuclease, tatD family	Aazo_1018	alr1593	Ava_4206	Npun_F4984
	yoaE		conserved hypothetical protein	(-)	(-)	(-)	(-)
	yqgF		Holliday junction resolvase YqgF	Aazo_4148	alr3100	Ava_3804	Npun_F0324
	yraL		tetrapyrrole methylase family protein	Aazo_1916	all4680	Ava_1987	Npun_R2378
Bold locus tags indicates reverse best hits, (*) = Pseudogene with functional copy present, (-) = Missing gene or pseudogene without functional copy, (+) = Unusual gene for cyanobacterial genomes.
NoAz = 'Nostoc azollae' 0708, Noss = Nostoc sp. PCC 7120, Avar = Anabaena variabilis ATCC 29413, Nosp = Nostoc punctiforme PCC 73102
