# Supplementary material for: Genome Erosion in a Nitrogen-Fixing Vertically Transmitted Endosymbiotic Multicellular Cyanobacterium
Source: PLoS One. 2010 Jul 8;5(7):e11486. doi: 10.1371/journal.pone.0011486 (PMC2900214; doi:10.1371/journal.pone.0011486)
Supplement: Table S4 — Genes used in the phylogenetic analysis of ‘Nostoc azollae’ 0708 (0.05 MB XLS) [file pone.0011486.s005.xls]

## Sheet: Sheet1
Table S4. Genes used in the phylogenetic analysis of 'Nostoc azollae' 0708
Locus_tag	Gene product
Aazo_0013	conserved hypothetical protein
Aazo_0020	bacteriochlorophyll/chlorophyll synthetase
Aazo_0034	nitrogen regulatory protein P-II
Aazo_0038	phosphoglucomutase/phosphomannomutase alpha/beta/alpha domain I
Aazo_0039	phosphoribosylglycinamide formyltransferase
Aazo_0048	cytochrome c-type biogenesis protein CcsB
Aazo_0051	acetyl-CoA carboxylase, biotin carboxylase
Aazo_0082	phosphatidate cytidylyltransferase
Aazo_0095	maf protein
Aazo_0096	photosystem II oxygen evolving complex protein PsbP
Aazo_0099	dihydrolipoamide dehydrogenase
Aazo_0100	Indole-3-glycerol-phosphate synthase
Aazo_0136	DNA polymerase I
Aazo_0146	transcriptional regulator, LysR family
Aazo_0150	proton-translocating NADH-quinone oxidoreductase, chain L
Aazo_0163	prolyl-tRNA synthetase
Aazo_0164	16S rRNA processing protein RimM
Aazo_0190	light-dependent protochlorophyllide reductase
Aazo_0231	alkyl hydroperoxide reductase
Aazo_0272	D-alanine/D-alanine ligase
Aazo_0299	1-hydroxy-2-methyl-2-(E)-butenyl 4-diphosphate synthase
Aazo_0308	chromosome segregation and condensation protein, ScpB
Aazo_0309	2-C-methyl-D-erythritol 4-phosphate cytidylyltransferase
Aazo_0325	FolC bifunctional protein
Aazo_0343	ketol-acid reductoisomerase
Aazo_0363	phosphoribosylaminoimidazole carboxylase, ATPase subunit
Aazo_0386	Sec-independent protein translocase, TatC subunit
Aazo_0398	ATP-NAD/AcoX kinase
Aazo_0399	NADH-ubiquinone oxidoreductase chain 4L
Aazo_0400	NADH-ubiquinone/plastoquinone oxidoreductase chain 6
Aazo_0402	NADH dehydrogenase (quinone)
Aazo_0412	alanine racemase
Aazo_0423	ribosomal protein L21
Aazo_0424	ribosomal protein L27
Aazo_0449	L-aspartate oxidase
Aazo_0451	conserved hypothetical protein
Aazo_0459	FeS-containing organism-specific oxidoreductase
Aazo_0466	HEAT domain containing protein
Aazo_0479	ornithine carbamoyltransferase
Aazo_0482	Domain of unknown function DUF1995
Aazo_0504	photosystem II protein PsbK
Aazo_0505	queuine tRNA-ribosyltransferase
Aazo_0537	UDP-N-acetylmuramoylalanyl-D-glutamyl-2,6-diamin opimelate/D-alanyl-D-alanylligase
Aazo_0540	conserved hypothetical protein
Aazo_0547	photosystem I core protein PsaA
Aazo_0567	lipoic acid synthetase
Aazo_0571	carbamoyl-phosphate synthase, large subunit
Aazo_0580	conserved hypothetical protein
Aazo_0584	DNA repair protein RadA
Aazo_0596	protein of unknown function DUF150
Aazo_0597	NusA antitermination factor
Aazo_0599	translation initiation factor IF-2
Aazo_0610	conserved hypothetical protein
Aazo_0611	conserved hypothetical protein
Aazo_0638	putative ATP-dependent DNA helicase DinG
Aazo_0639	conserved hypothetical protein
Aazo_0646	1-deoxy-D-xylulose 5-phosphate reductoisomerase
Aazo_0659	ribosomal protein S12
Aazo_0662	translation elongation factor Tu
Aazo_0663	ribosomal protein S10
Aazo_0664	peptidase S16 lon domain protein
Aazo_0665	Prephenate dehydratase
Aazo_0667	Ribonuclease H
Aazo_0668	ribonuclease, Rne/Rng family
Aazo_0674	Abortive infection protein
Aazo_0686	conserved hypothetical protein
Aazo_0702	phospho-N-acetylmuramoyl-pentapeptide-transferas e
Aazo_0718	UBA/THIF-type NAD/FAD binding protein
Aazo_0744	chromosome segregation protein SMC
Aazo_0752	methyltransferase GidB
Aazo_0779	phosphoribosylamine/glycine ligase
Aazo_0780	multi-sensor signal transduction histidine kinase
Aazo_0797	FeS assembly ATPase SufC
Aazo_0798	FeS assembly protein SufD
Aazo_0799	cysteine desulfurase, SufS subfamily
Aazo_0809	acetyl-CoA carboxylase, biotin carboxyl carrier protein
Aazo_0810	translation elongation factor P
Aazo_0812	thiamine-monophosphate kinase
Aazo_0817	conserved hypothetical protein
Aazo_0818	protein tyrosine phosphatase
Aazo_0835	chorismate synthase
Aazo_0838	ribosome biogenesis GTP-binding protein YlqF
Aazo_0847	adenosylhomocysteinase
Aazo_0858	solanesyl diphosphate synthase
Aazo_0860	glutamate racemase
Aazo_0869	riboflavin biosynthesis protein RibD
Aazo_0888	inositol monophosphatase
Aazo_0890	ferredoxin [2Fe-2S]
Aazo_0903	pantetheine-phosphate adenylyltransferase
Aazo_0904	prolipoprotein diacylglyceryl transferase
Aazo_0906	radical SAM enzyme, Cfr family
Aazo_0909	excinuclease ABC, C subunit
Aazo_0922	glycyl-tRNA synthetase, alpha subunit
Aazo_0969	acetyl-CoA carboxylase, carboxyl transferase, beta subunit
Aazo_0972	3-isopropylmalate dehydrogenase
Aazo_0994	protein of unknown function YGGT
Aazo_0998	Mammalian cell entry related domain protein
Aazo_0999	conserved hypothetical protein
Aazo_1015	DNA-directed RNA polymerase, gamma subunit
Aazo_1018	hydrolase, TatD family
Aazo_1019	ribosomal protein S20
Aazo_1020	histidinol dehydrogenase
Aazo_1033	Fructosamine/Ketosamine-3-kinase
Aazo_1038	ribosomal protein L10
Aazo_1043	ribosomal protein L19
Aazo_1060	photosystem II 44 kDa subunit reaction center protein
Aazo_1064	short-chain dehydrogenase/reductase SDR
Aazo_1065	transcriptional regulator, Crp/Fnr family
Aazo_1067	conserved hypothetical protein
Aazo_1069	conserved hypothetical protein
Aazo_1071	polyribonucleotide nucleotidyltransferase
Aazo_1075	dihydropteroate synthase
Aazo_1078	triosephosphate isomerase
Aazo_1091	glucose-6-phosphate 1-dehydrogenase
Aazo_1096	acetolactate synthase, small subunit
Aazo_1145	PhoH family protein
Aazo_1154	shikimate 5-dehydrogenase
Aazo_1169	argininosuccinate lyase
Aazo_1171	1-(5-phosphoribosyl)-5-amino-4-imidazole- carboxylate (AIR) carboxylase
Aazo_1175	tRNA (guanine-N1)-methyltransferase
Aazo_1182	phosphatidate cytidylyltransferase
Aazo_1184	pseudouridine synthase
Aazo_1199	ATP-binding region ATPase domain protein
Aazo_1220	protein of unknown function DUF561
Aazo_1237	cytochrome b559, alpha subunit
Aazo_1240	NADH-ubiquinone/plastoquinone oxidoreductase chain 3
Aazo_1242	NADH dehydrogenase (ubiquinone) 30 kDa subunit
Aazo_1257	hydroxymethylbutenyl pyrophosphate reductase
Aazo_1275	6-phosphogluconate dehydrogenase, decarboxylating
Aazo_1397	gamma-glutamyl phosphate reductase
Aazo_1418	diaminopimelate epimerase
Aazo_1439	catalytic domain of components of various dehydrogenase complexes
Aazo_1453	protein of unknown function DUF92 transmembrane
Aazo_1472	aspartate carbamoyltransferase
Aazo_1505	farnesyl-diphosphate synthase
Aazo_1506	Methenyltetrahydrofolate cyclohydrolase
Aazo_1519	DNA mismatch repair protein MutS
Aazo_1522	6-phosphogluconolactonase
Aazo_1556	GMP synthase, large subunit
Aazo_1582	tRNA(5-methylaminomethyl-2-thiouridylate)-methyl transferase
Aazo_1588	signal recognition particle-docking protein FtsY
Aazo_1589	NusB antitermination factor
Aazo_1611	GTP-binding protein Era
Aazo_1633	acyl carrier protein
Aazo_1634	3-oxoacyl-[acyl-carrier-protein] synthase 2
Aazo_1635	transketolase
Aazo_1651	orotate phosphoribosyltransferase
Aazo_1659	3,4-dihydroxy-2-butanone 4-phosphate synthase
Aazo_1684	conserved hypothetical protein
Aazo_1696	Phosphoenolpyruvate carboxylase
Aazo_1702	cytb6/f complex subunit IV
Aazo_1703	Cytochrome b/b6 domain
Aazo_1772	DNA replication and repair protein RecF
Aazo_1800	VacB and RNase II family 3'-5' exoribonuclease
Aazo_1815	Abortive infection protein
Aazo_1845	Nucleoside-diphosphate kinase
Aazo_1848	chromosome segregation and condensation protein ScpA
Aazo_1854	acetylglutamate kinase
Aazo_1855	Shikimate kinase
Aazo_1865	microcompartments protein
Aazo_1893	imidazoleglycerol phosphate synthase, cyclase subunit
Aazo_1898	photosystem II manganese-stabilizing protein PsbO
Aazo_1904	glutathione synthetase
Aazo_1908	tRNA modification GTPase TrmE
Aazo_1909	dihydrodipicolinate reductase
Aazo_1916	Uroporphyrin-III C/tetrapyrrole (Corrin/Porphyrin) methyltransferase
Aazo_1919	peptidyl-tRNA hydrolase
Aazo_1921	photosystem II phosphoprotein PsbH
Aazo_1936	protein of unknown function DUF1092
Aazo_1938	ATP synthase F1, epsilon subunit
Aazo_1939	ATP synthase F1, beta subunit
Aazo_1959	cytochrome f
Aazo_1973	GrpE protein
Aazo_1982	ribosome small subunit-dependent GTPase A
Aazo_1992	Septum formation inhibitor MinC
Aazo_1993	septum site-determining protein MinD
Aazo_1994	cell division topological specificity factor MinE
Aazo_1999	MutS2 family protein
Aazo_2017	fatty acid/phospholipid synthesis protein PlsX
Aazo_2018	Leucyl aminopeptidase
Aazo_2031	transcriptional regulator, LuxR family
Aazo_2035	Rho termination factor domain protein
Aazo_2038	S-adenosyl-methyltransferase MraW
Aazo_2039	ABC transporter related
Aazo_2059	heat shock protein DnaJ domain protein
Aazo_2060	arginyl-tRNA synthetase
Aazo_2065	Domain of unknown function DUF1825
Aazo_2067	tyrosyl-tRNA synthetase
Aazo_2068	orotidine 5'-phosphate decarboxylase
Aazo_2071	4Fe-4S ferredoxin iron-sulfur binding domain protein
Aazo_2082	DNA polymerase III, beta subunit
Aazo_2094	adenylosuccinate lyase
Aazo_2142	methyltransferase
Aazo_2143	imidazole glycerol phosphate synthase, glutamine amidotransferase subunit
Aazo_2151	Ribulose-bisphosphate carboxylase
Aazo_2153	Ribulose-bisphosphate carboxylase
Aazo_2155	3-methyl-2-oxobutanoatehydroxymethyltransferase
Aazo_2156	D-3-phosphoglycerate dehydrogenase
Aazo_2157	ribosomal protein L11 methyltransferase
Aazo_2177	Uracil phosphoribosyltransferase
Aazo_2190	3-dehydroquinate dehydratase, type II
Aazo_2193	DNA topoisomerase I
Aazo_2203	Queuosine synthesis-like
Aazo_2208	pyruvate kinase
Aazo_2221	aspartate kinase
Aazo_2258	conserved hypothetical protein
Aazo_2260	protein of unknown function DUF205
Aazo_2282	carbamoyl-phosphate synthase, small subunit
Aazo_2285	RNA methyltransferase, TrmH family, group 3
Aazo_2306	light-independent protochlorophyllide reductase, iron-sulfur ATP-binding protein
Aazo_2353	dihydroorotate dehydrogenase
Aazo_2416	protein of unknown function UPF0016
Aazo_2420	glucose inhibited division protein A
Aazo_2454	ATP phosphoribosyltransferase
Aazo_2496	phosphopantothenoylcysteine decarboxylase/phosphopantothenate/cysteine ligase
Aazo_2498	phospholipase/Carboxylesterase
Aazo_2501	ATP-NAD/AcoX kinase
Aazo_2502	NmrA family protein
Aazo_2504	4-hydroxythreonine-4-phosphate dehydrogenase
Aazo_2509	3'-5' exonuclease
Aazo_2513	L-asparaginase II
Aazo_2515	iojap-like protein
Aazo_2538	deoxyribose-phosphate aldolase
Aazo_2539	DNA repair protein RecO
Aazo_2541	glycosyl transferase group 1
Aazo_2545	preprotein translocase, SecG subunit
Aazo_2546	phosphoglycerate mutase, 2,3-bisphosphoglycerate-independent
Aazo_2558	NADH dehydrogenase I subunit N
Aazo_2559	50S ribosomal protein L3
Aazo_2560	ribosomal protein L4/L1e
Aazo_2561	Ribosomal protein L25/L23
Aazo_2562	ribosomal protein L2
Aazo_2563	ribosomal protein S19
Aazo_2564	ribosomal protein L22
Aazo_2565	ribosomal protein S3
Aazo_2566	ribosomal protein L16
Aazo_2567	ribosomal protein L29
Aazo_2570	ribosomal protein L24
Aazo_2571	ribosomal protein L5
Aazo_2572	ribosomal protein S8
Aazo_2573	ribosomal protein L6
Aazo_2574	ribosomal protein L18
Aazo_2577	preprotein translocase, SecY subunit
Aazo_2581	30S ribosomal protein S13
Aazo_2582	30S ribosomal protein S11
Aazo_2583	DNA-directed RNA polymerase, alpha subunit
Aazo_2584	ribosomal protein L17
Aazo_2585	tRNA pseudouridine synthase A
Aazo_2589	peptide chain release factor 1
Aazo_2622	ATPase-like, ParA/MinD
Aazo_2624	conserved hypothetical protein
Aazo_2675	glutamate-1-semialdehyde-2,1-aminomutase
Aazo_2686	5-formyltetrahydrofolate cyclo-ligase
Aazo_2693	CDP-diacylglycerol/glycerol-3-phosphate3-phospha tidyltransferase
Aazo_2698	Inorganic diphosphatase
Aazo_2713	NAD(P)H-quinone oxidoreductase subunit M
Aazo_2722	peptide deformylase
Aazo_2726	ribosomal protein S14
Aazo_2727	endonuclease III
Aazo_2728	membrane-associated zinc metalloprotease
Aazo_2729	seryl-tRNA synthetase
Aazo_2731	conserved hypothetical protein
Aazo_2744	phosphoribosylformimino-5-aminoimidazole carboxamide ribotide isomerase
Aazo_2745	conserved hypothetical protein
Aazo_2746	Protein of unknown function DUF2499
Aazo_2760	biotin/acetyl-CoA-carboxylase ligase
Aazo_2762	riboflavin synthase, alpha subunit
Aazo_2775	glutamyl-tRNA reductase
Aazo_2778	CMP/dCMP deaminase zinc-binding
Aazo_2783	BolA family protein
Aazo_2784	glutaredoxin-like protein
Aazo_2815	tRNA delta(2)-isopentenylpyrophosphate transferase
Aazo_2817	RNA polymerase, sigma 70 subunit, RpoD subfamily
Aazo_2822	Tetratricopeptide TPR_2 repeat protein
Aazo_2874	Phytoene synthase
Aazo_2880	homoserine kinase
Aazo_2895	Peptidylprolyl isomerase
Aazo_2897	ribosomal protein L9
Aazo_2898	hydroxyacylglutathione hydrolase
Aazo_2905	ABC-1 domain protein
Aazo_2907	quinolinate synthetase complex, A subunit
Aazo_2917	RNA-metabolising metallo-beta-lactamase
Aazo_2918	dihydrodipicolinate synthase
Aazo_2919	aspartate-semialdehyde dehydrogenase
Aazo_2922	trigger factor
Aazo_2954	Endopeptidase Clp
Aazo_2962	conserved hypothetical protein
Aazo_2984	glycyl-tRNA synthetase, beta subunit
Aazo_2985	UDP-N-acetylmuramoylalanine/D-glutamate ligase
Aazo_2999	peptidase M22 glycoprotease
Aazo_3003	acetylornithine and succinylornithine aminotransferase
Aazo_3025	DNA polymerase III, delta prime subunit
Aazo_3035	ABC transporter related
Aazo_3042	(p)ppGpp synthetase I, SpoT/RelA
Aazo_3060	glutamyl-tRNA synthetase
Aazo_3088	alanyl-tRNA synthetase
Aazo_3150	phosphoribosylformylglycinamidine cyclo-ligase
Aazo_3193	conserved hypothetical protein
Aazo_3194	Protein of unknown function DUF482
Aazo_3207	3-oxoacyl-(acyl-carrier-protein) reductase
Aazo_3236	excinuclease ABC, B subunit
Aazo_3254	phenylalanyl-tRNA synthetase, alpha subunit
Aazo_3256	stationary-phase survival protein SurE
Aazo_3260	riboflavin biosynthesis protein RibF
Aazo_3269	preprotein translocase, SecA subunit
Aazo_3280	magnesium chelatase ATPase subunit I
Aazo_3303	DRTGG domain protein
Aazo_3314	thiamine-phosphate pyrophosphorylase
Aazo_3332	ATP synthase I
Aazo_3333	ATP synthase F0, A subunit
Aazo_3334	ATP synthase F0, C subunit
Aazo_3335	H+transporting two-sector ATPase B/B' subunit
Aazo_3336	ATP synthase F0, B subunit
Aazo_3337	ATP synthase F1, delta subunit
Aazo_3338	ATP synthase F1, alpha subunit
Aazo_3339	ATP synthase F1, gamma subunit
Aazo_3355	Protein of unknown function DUF2518
Aazo_3369	acetyl-CoA carboxylase, carboxyl transferase, alpha subunit
Aazo_3378	Phosphoribosylanthranilate isomerase
Aazo_3394	phosphoribosylformylglycinamidine synthase II
Aazo_3396	amidophosphoribosyltransferase
Aazo_3408	cell cycle protein
Aazo_3415	magnesium protoporphyrin O-methyltransferase
Aazo_3419	Nicotinate-nucleotide-dimethylbenzimidazolephosp horibosyltransferase
Aazo_3427	conserved hypothetical protein
Aazo_3429	formamidopyrimidine-DNA glycosylase
Aazo_3441	nitrogen-fixing NifU domain protein
Aazo_3444	GTP-binding protein LepA
Aazo_3459	dephospho-CoA kinase
Aazo_3464	potassium uptake protein, TrkH family
Aazo_3465	TrkA-N domain protein
Aazo_3467	S-adenosylmethionine/tRNA-ribosyltransferase-iso merase
Aazo_3470	pentapeptide repeat protein
Aazo_3490	pseudouridine synthase, RluA family
Aazo_3501	IMP dehydrogenase family protein
Aazo_3506	phosphoribosylformylglycinamidine synthase I
Aazo_3524	adenylosuccinate synthetase
Aazo_3531	light-independent protochlorophyllide reductase, B subunit
Aazo_3533	histidine triad (HIT) protein
Aazo_3538	DNA polymerase III, delta subunit
Aazo_3553	Aluminium resistance family protein
Aazo_3566	ribosome-associated GTPase EngA
Aazo_3572	cytochrome oxidase assembly
Aazo_3583	CAB/ELIP/HLIP-related protein
Aazo_3593	photosystem I protein PsaD
Aazo_3594	anthranilate synthase component I
Aazo_3600	conserved hypothetical protein
Aazo_3601	UDP-N-acetylglucosamine--N-acetylmuramyl- (pentapeptide) pyrophosphoryl-undecaprenol N-acetylglucosamine transferase
Aazo_3623	phosphoribosylaminoimidazole carboxylase, catalytic subunit
Aazo_3647	DNA repair protein RecN
Aazo_3653	putative anti-sigma regulatory factor, serine/threonine protein kinase
Aazo_3674	ResB family protein
Aazo_3675	cytochrome c biogenesis protein transmembrane region
Aazo_3680	recombination protein RecR
Aazo_3686	DNA primase
Aazo_3700	NAD-dependent epimerase/dehydratase
Aazo_3711	hemolysin A
Aazo_3715	glutamine synthetase, type I
Aazo_3730	ribosomal protein S4
Aazo_3738	acyl-[acyl-carrier-protein]--UDP-N-acetylglucosa mineO-acyltransferase
Aazo_3739	beta-hydroxyacyl-(acyl-carrier-protein) dehydratase FabZ
Aazo_3740	UDP-3-0-acyl N-acetylglucosamine deacetylase
Aazo_3742	phosphoribosylaminoimidazole-succinocarboxamides ynthase
Aazo_3794	GTP-binding protein YchF
Aazo_3801	Orn/Lys/Arg decarboxylase major region
Aazo_3809	4-diphosphocytidyl-2C-methyl-D-erythritolkinase
Aazo_3810	dimethyladenosine transferase
Aazo_3835	microcompartments protein
Aazo_3857	cobyric acid synthase CobQ
Aazo_3861	ABC-2 type transporter
Aazo_3886	protein of unknown function DUF185
Aazo_3891	sugar fermentation stimulation protein
Aazo_3900	Prephenate dehydrogenase
Aazo_3907	ribosomal protein S15
Aazo_3932	peptidase M15B and M15C DD-carboxypeptidase VanY/endolysin
Aazo_3952	GTP-binding protein Obg/CgtA
Aazo_3955	Peptidoglycan glycosyltransferase
Aazo_3964	ABC-1 domain protein
Aazo_3996	aconitate hydratase 2
Aazo_4038	geranylgeranyl reductase
Aazo_4054	CTP synthase
Aazo_4098	histidine kinase
Aazo_4100	ABC-1 domain protein
Aazo_4102	valyl-tRNA synthetase
Aazo_4111	RNA binding S1 domain protein
Aazo_4113	photosystem II chlorophyll-binding protein CP47
Aazo_4135	DNA polymerase III, alpha subunit
Aazo_4142	4-hydroxybenzoate polyprenyl transferase
Aazo_4149	protein of unknown function DUF1292
Aazo_4151	glutamate 5-kinase
Aazo_4197	leucyl-tRNA synthetase
Aazo_4204	glutaredoxin 2
Aazo_4205	UDP-N-acetylmuramyl-tripeptide synthetase
Aazo_4207	glutamyl-tRNA(Gln) amidotransferase, C subunit
Aazo_4224	RNA methyltransferase, TrmH family, group 1
Aazo_4242	Phosphoglycerate mutase
Aazo_4268	PilT protein domain protein
Aazo_4269	oxygen-independent coproporphyrinogen III oxidase
Aazo_4275	Phosphoglycerate kinase
Aazo_4282	pantoate/beta-alanine ligase
Aazo_4297	6,7-dimethyl-8-ribityllumazine synthase
Aazo_4309	ribosomal protein L20
Aazo_4318	ubiquinone/menaquinone biosynthesis methyltransferase
Aazo_4353	DNA polymerase III, subunits gamma and tau
Aazo_4363	glutamyl-tRNA(Gln) amidotransferase, B subunit
Aazo_4364	arginine biosynthesis bifunctional protein ArgJ
Aazo_4372	ribose-phosphate pyrophosphokinase
Aazo_4378	GTP-binding protein TypA
Aazo_4386	protein of unknown function DUF309
Aazo_4389	ABC transporter related
Aazo_4395	deoxyxylulose-5-phosphate synthase
Aazo_4401	ribose 5-phosphate isomerase
Aazo_4404	transcription-repair coupling factor
Aazo_4421	pyrroline-5-carboxylate reductase
Aazo_4422	protein of unknown function DUF552
Aazo_4434	glutamyl-tRNA(Gln) amidotransferase, A subunit
Aazo_4456	protein of unknown function UPF0052 and CofD
Aazo_4457	crossover junction endodeoxyribonuclease RuvC
Aazo_4499	tRNA/rRNA methyltransferase (SpoU)
Aazo_4500	UDP-N-acetylglucosamine1-carboxyvinyltransferase
Aazo_4523	ribonuclease Z
Aazo_4529	cobalbumin biosynthesis protein
Aazo_4538	protein-export membrane protein SecF
Aazo_4539	protein-export membrane protein SecD
Aazo_4574	conserved hypothetical protein
Aazo_4577	magnesium chelatase ATPase subunit D
Aazo_4601	Nitrilase/cyanide hydratase and apolipoprotein N-acyltransferase
Aazo_4608	glutamate/cysteine ligase
Aazo_4609	RNA methyltransferase, TrmH family, group 2
Aazo_4615	alkyl hydroperoxide reductase/ Thiol specific antioxidant/ Mal allergen
Aazo_4669	methylenetetrahydrofolate reductase
Aazo_4670	tryptophanyl-tRNA synthetase
Aazo_4722	conserved hypothetical protein
Aazo_4732	heat shock protein DnaJ domain protein
Aazo_4735	protein of unknown function DUF147
Aazo_4736	diaminopimelate decarboxylase
Aazo_4737	ribosomal-protein-alanine acetyltransferase
Aazo_4780	domain of unknown function DUF1731
Aazo_4783	iron-sulfur cluster assembly accessory protein
Aazo_4797	glycine oxidase ThiO
Aazo_4817	FAD-dependent pyridine nucleotide-disulphide oxidoreductase
Aazo_4831	excinuclease ABC, A subunit
Aazo_4838	S-adenosylmethionine synthetase
Aazo_4863	glycine cleavage system T protein
Aazo_4865	glycine dehydrogenase
Aazo_4880	ATP-dependent DNA helicase RecG
Aazo_4882	translation elongation factor Ts
Aazo_4883	ribosomal protein S2
Aazo_4887	glycosyl transferase family 2
Aazo_4888	argininosuccinate synthase
Aazo_4893	ribosomal protein S6
Aazo_4898	Glycine hydroxymethyltransferase
Aazo_4927	ribosome-binding factor A
Aazo_4936	protein of unknown function DUF111
Aazo_4941	conserved hypothetical protein
Aazo_4955	tRNA(Ile)-lysidine synthetase
Aazo_4963	phenylalanyl-tRNA synthetase, beta subunit
Aazo_4971	protein-(glutamine-N5) methyltransferase, release factor-specific
Aazo_4977	metalloendopeptidase, glycoprotease family
Aazo_4978	photosystem I reaction center protein PsaF subunit III
Aazo_4981	guanylate kinase
Aazo_4999	RNA modification enzyme, MiaB family
Aazo_5027	3-isopropylmalate dehydratase, small subunit
Aazo_5028	3-isopropylmalate dehydratase, large subunit
Aazo_5081	photosystem II S4 domain protein
Aazo_5112	exodeoxyribonuclease III
Aazo_5115	Retinal pigment epithelial membrane protein
Aazo_5129	glycogen/starch synthase, ADP-glucose type
Aazo_5131	porphobilinogen deaminase
Aazo_5159	uroporphyrinogen decarboxylase
Aazo_5173	ribosomal protein S18
Aazo_5174	Exoribonuclease II
Aazo_5177	aminotransferase class I and II
Aazo_5179	3-dehydroquinate synthase
Aazo_5207	two component transcriptional regulator, winged helix family
Aazo_5218	glucosamine/fructose-6-phosphate aminotransferase, isomerizing
